# Supplementary material
Source: PubMed Central journal article supplement (PMC8085865)
Supplement: ajcr0011-1697-f5.pdf [file ajcr0011-1697-f5.pdf]

## Efficacy and biomarkers of CAN017 in ESCC

**Table S1.** Summary of the efficacy of CAN017, HER3 and NRG1 expressions on PDX models of cohort 1

| PDX model ID | TGI (%) | HER3 IHC score | NRG1 IHC score | HER3 RNAseq<br>(log <sub>2</sub> (FPKM+1)) | NRG1 RNAseq<br>(log <sub>2</sub> (FPKM+1)) |
|--------------|---------|----------------|----------------|--------------------------------------------|--------------------------------------------|
| ES0214       | 135.11  | 3+             | 1+             | 5.97                                       | 2.98                                       |
| ES0191       | 116.56  | 1+             | 2+             | 6.21                                       | 1.54                                       |
| ES0042       | 109.43  | 1+             | 2+             | 4.16                                       | 3.68                                       |
| ES0199       | 105.92  | 3+             | 3+             | 5.14                                       | 3.35                                       |
| ES0147       | 100.62  | 2+             | 3+             | 7.17                                       | 2.3                                        |
| ES0176       | 79.63   | 1+             | 2+             | 5.06                                       | 2.98                                       |
| ES0190       | 78.42   | 1+             | 2+             | 4.93                                       | 3.37                                       |
| ES0141       | 74.35   | 1+             | 1+             | 3.93                                       | 2.88                                       |
| ES0189       | 60.26   | 1+             | 3+             | 5.74                                       | -0.53                                      |
| ES2411       | 45.06   | 1+             | 1+             | 4.9                                        | 1.2                                        |
| ES0195       | 44.86   | 3+             | 1+             | 5.08                                       | 1.84                                       |
| ES0172       | 44.58   | 2+             | 1+             | 5.14                                       | 1.14                                       |
| ES0218       | 25.23   | 2+             | 1+             | 3.17                                       | 0.17                                       |
| ES0201       | 24.05   | 1+             | 3+             | 5.73                                       | 1.72                                       |
| ES0219       | 23.67   | 1+             | 1+             | 5.84                                       | 0.35                                       |
| ES2267       | 16.09   | 1+             | 2+             | 7.98                                       | -2                                         |
| ES6824       | 14.61   | 1+             | 1+             | 5.26                                       | -1.85                                      |
| ES0148       | 13.13   | 0              | 3+             | 6.42                                       | -2                                         |
| ES0026       | 6.78    | 1+             | 2+             | 3.54                                       | 2.52                                       |
| ES2263       | 0.57    | 2+             | 2+             | 1.44                                       | 3.55                                       |
| ES0215       | -2.04   | 1+             | 2+             | -0.42                                      | -0.72                                      |
| ES0630       | -6.04   | 0              | 1+             | 3.54                                       | 0.78                                       |
| ES0204       | -16.49  | 1+             | 1+             | 5.32                                       | 0.3                                        |
| ES0136       | -40.48  | 1+             | 1+             | 5.56                                       | -1.12                                      |

**Table S2.** Summary of NRG1 expressions evaluated by RT-PCR on 11 NRG1-high and 13 NRG1-low PDX models of cohort 1

| Groups    | PDX model ID | ΔC <sub>t</sub> (NRG1) |
|-----------|--------------|------------------------|
| NRG1-high | ES0214       | 4.05848333             |
|           | ES2263       | 4.536124333            |
|           | ES0176       | 5.505088333            |
|           | ES0141       | 5.618715               |
|           | ES0191       | 5.837773667            |
|           | ES0199       | 6.643713333            |
|           | ES0147       | 6.866417               |
|           | ES0195       | 6.874196               |
|           | ES0042       | 6.914877333            |
|           | ES0172       | 7.077805333            |
|           | ES0190       | 7.426407667            |
| NRG1-low  | ES0630       | 8.162932333            |
|           | ES0026       | 8.552053               |
|           | ES0201       | 9.356858333            |
|           | ES0219       | 9.935386333            |
|           | ES0204       | 10.724936              |

## Efficacy and biomarkers of CAN017 in ESCC

|        |             |
|--------|-------------|
| ES0189 | 10.98290967 |
| ES0215 | 11.179748   |
| ES0218 | 11.378266   |
| ES0136 | 12.225814   |
| ES6824 | 13.306448   |
| ES2411 | 14.76201567 |
| ES2267 | 16.686158   |
| ES0148 | 17.12613767 |

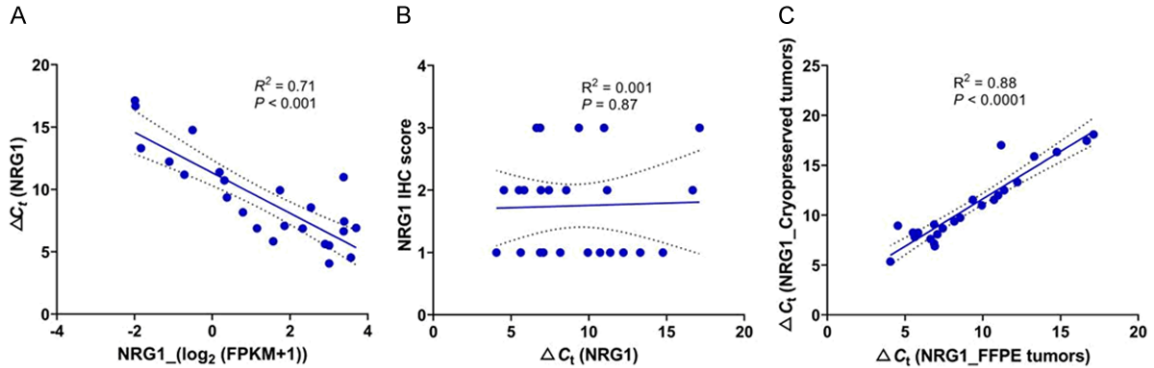

**Figure S1.** NRG1 expressions in tumor samples prior to treatment in cohort 1. A. Pearson correlation plots of the NRG1 mRNA expression detected by RNAseq and RT-PCR in PDX tumors (n = 24). B. Pearson correlation of the NRG1 mRNA and protein expressions in FFPE tumors (n = 24). C. Pearson correlation of the NRG1 mRNA expression in cryopreserved tumors and paired FFPE tumors. The linear regression was shown by a solid line, and 95% confidence interval (CI) of the values fitted by linear regression was shown by dark dotted lines. R<sup>2</sup>, the coefficient of determination.

**Table S3.** The data of AUC curves for analyzing the threshold of NRG1  $\Delta C_t$

| Positive if less than or equal to <sup>a</sup> | Sensitivity | 1-Specificity | Yoden Index <sup>b</sup> |
|------------------------------------------------|-------------|---------------|--------------------------|
| 3.0585                                         | 0           | 0             | 0                        |
| 4.2973                                         | 0.125       | 0             | 0.125                    |
| 5.0206                                         | 0.125       | 0.063         | 0.062                    |
| 5.5619                                         | 0.25        | 0.063         | 0.187                    |
| 5.7282                                         | 0.375       | 0.063         | 0.312                    |
| 6.2407                                         | 0.5         | 0.063         | 0.437                    |
| 6.7551                                         | 0.625       | 0.063         | 0.562                    |
| 6.8703                                         | 0.75        | 0.063         | 0.687                    |
| 6.8945                                         | 0.75        | 0.125         | 0.625                    |
| 6.9963                                         | 0.875       | 0.125         | 0.75                     |
| 7.2521                                         | 0.875       | 0.188         | 0.687                    |
| <b>7.7947</b>                                  | <b>1</b>    | <b>0.188</b>  | <b>0.812</b>             |
| 8.3575                                         | 1           | 0.25          | 0.75                     |
| 8.9545                                         | 1           | 0.313         | 0.687                    |
| 9.6461                                         | 1           | 0.375         | 0.625                    |
| 10.3302                                        | 1           | 0.438         | 0.562                    |
| 10.8539                                        | 1           | 0.5           | 0.5                      |
| 11.0813                                        | 1           | 0.563         | 0.437                    |
| 11.279                                         | 1           | 0.625         | 0.375                    |

## Efficacy and biomarkers of CAN017 in ESCC

|         |   |       |       |
|---------|---|-------|-------|
| 11.802  | 1 | 0.688 | 0.312 |
| 12.7661 | 1 | 0.75  | 0.25  |
| 14.0342 | 1 | 0.813 | 0.187 |
| 15.7241 | 1 | 0.875 | 0.125 |
| 16.9061 | 1 | 0.938 | 0.062 |
| 18.1261 | 1 | 1     | 0     |

<sup>a</sup>The smallest cut-off value was the minimum observed test value minus 1, and the largest cut-off value was the maximum observed test value plus 1. All the other cut-off values were the averages of two consecutive ordered observed test values.

<sup>b</sup>Yoden Index = Sensitivity-(1-specificity). A threshold with the maximum Yoden index meant the optimal threshold (Shown in bold).

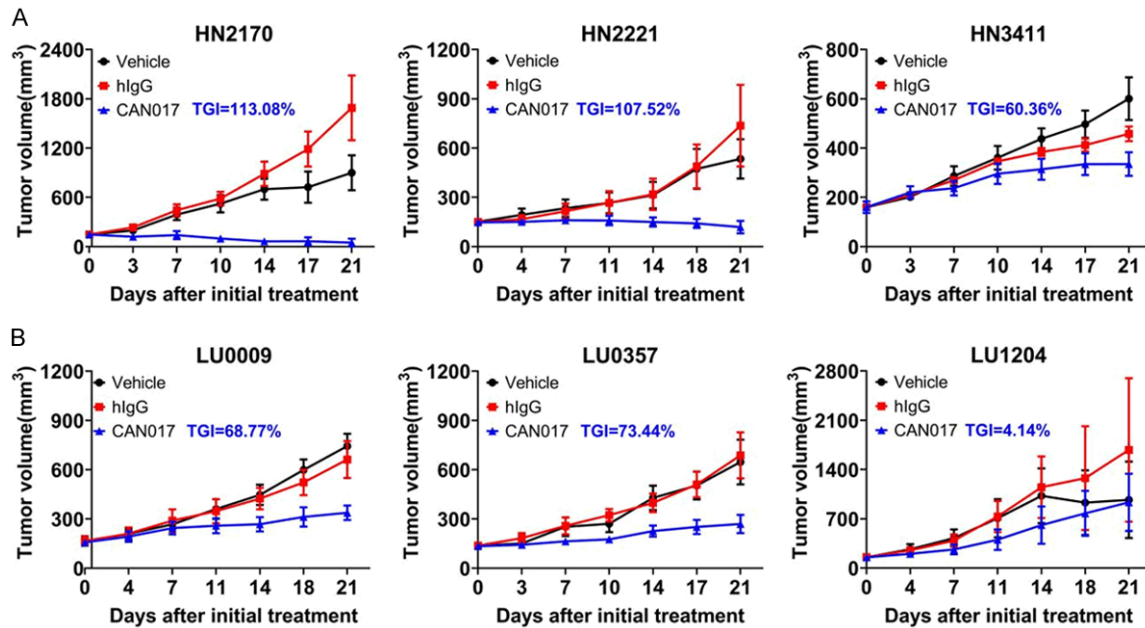

**Figure S2.** Efficacy of CAN017 on PDX models derived from head and neck cancer and NSCLC. A. Tumor growth curves showed the *in vivo* activity of CAN017 in 3 head and neck cancer PDX models. B. Tumor growth curves showed the *in vivo* activity of CAN017 in 3 NSCLC PDX models. Mice were randomized and treated with vehicle control, hlgG control (20 mg/kg) and CAN017 (20 mg/kg) when tumor volume reached approximately 150 mm<sup>3</sup>. The anti-tumor activity was depicted by TGI described in each picture. Data were presented as means  $\pm$  SDs.
